# Supplementary material for: Prevalence and Predictors of Sepsis Death in Patients With Chronic Heart Failure and Reduced Left Ventricular Ejection Fraction
Source: PubMed Central journal article supplement (PMC6474963; doi:10.1161/jaha.118.009684), 2018-10-04
Supplement: JAH3-7-e009684-s001.pdf [file JAH3-7-e009684-s001.pdf]

# **Supplemental Material**

## **Data S1.**

### **Supplemental Methods**

#### *Imputation methods*

Multiple imputation by chained equations under the missing at random assumption was used to impute 50 sets of data to minimise any potential bias caused by missing data.<sup>1-2</sup> The imputation model specification was such that it included all variables included in the analysis model, including outcome variables (Nelson-Aalen survival estimator for each cause of death and a censoring indicator) as well as auxiliary variables as indicated in the table below. Results presented in the manuscript contain estimates averaged over 50 imputed data sets according to Rubin's rules.

**Table S1. Imputation model specification for 20 iterations and 50 imputations.**

| <b>Variable</b>                                                                         | <b>Missing (%)</b> | <b>Type</b>          | <b>Specification for imputation</b>                                 |
|-----------------------------------------------------------------------------------------|--------------------|----------------------|---------------------------------------------------------------------|
| Nelson-Aalen survival estimate (included as separate variables for each cause of death) | 0                  | Continuous (Outcome) | Complete data - included as an auxiliary variable for survival time |
| Censoring indicator                                                                     | 0                  | Binary (Outcome)     | Complete data - included as an auxiliary variable                   |
| Cause of death                                                                          | 0                  | Categorical          | Complete data - included as an auxiliary variable                   |
| Sex                                                                                     | 0                  | Binary               | Complete data - included as an auxiliary variable                   |
| Diabetes                                                                                | 0                  | Binary               | Complete data - included as an auxiliary variable                   |
| COPD                                                                                    | 0                  | Binary               | Complete data - included as an auxiliary variable                   |
| Ischaemic HF Aetiology                                                                  | 0                  | Binary               | Complete data - included as an auxiliary variable                   |
| ICD                                                                                     | 0                  | Binary               | Complete data - included as an auxiliary variable                   |
| CRT                                                                                     | 0                  | Binary               | Complete data - included as an auxiliary variable                   |
| Age                                                                                     | 0                  | Continuous           | Linear regression                                                   |
| NYHA Class                                                                              | 0.1                | Categorical          | Ordinal logistic regression                                         |
| Heart Rate                                                                              | 8.8                | Continuous           | Linear regression                                                   |
| QRS interval                                                                            | 8.8                | Continuous           | Log transformed and imputed using linear regression                 |
| Haemoglobin                                                                             | 0.3                | Continuous           | Linear regression                                                   |
| Sodium                                                                                  | 0.2                | Continuous           | Predictive mean matching                                            |
| White blood cell count                                                                  | 0.3                | Continuous           | Predictive mean matching                                            |
| Lymphocytes                                                                             | 1.2                | Continuous           | Complete data - included as an auxiliary variable                   |
| Neutrophils                                                                             | 1.2                | Continuous           | Complete data - included as an auxiliary variable                   |
| Platelet count                                                                          | 0.3                | Continuous           | Complete data - included as an auxiliary variable                   |
| eGFR                                                                                    | 0.4                | Continuous           | Linear regression                                                   |
| VitaminD                                                                                | 30.5               | Continuous           | Log transformed and imputed using linear                            |

|                      |     |            |                          |
|----------------------|-----|------------|--------------------------|
|                      |     |            | regression               |
| Albumin              | 3.1 | Continuous | Linear regression        |
| LV ejection fraction | 2.5 | Continuous | Linear regression        |
| Ramipril Dose        | 0.3 | Continuous | Predictive mean matching |
| Bisoprolol Dose      | 0.3 | Continuous | Predictive mean matching |
| Furosemide Dose      | 0.3 | Continuous | Predictive mean matching |

COPD - chronic obstructive pulmonary disease; HF - heart failure; ICD - implantable cardioverter defibrillator; CRT - cardiac resynchronisation therapy; NYHA - New York heart association; eGFR - estimated glomerular filtration rate; LV - left ventricular.

**Table S2. Multivariate predictors of sepsis death in people with LVEF<40%.**

| Variable                             | HR   | 95% CI of HR |      | p value | Wald  | % Global Wald |
|--------------------------------------|------|--------------|------|---------|-------|---------------|
|                                      |      | Low          | High |         |       |               |
| Age (per year)                       | 1.04 | 1.02         | 1.07 | 0.000   | 12.66 | 11.29         |
| Male sex                             | 1.21 | 0.75         | 1.97 | 0.439   | 0.60  | 0.54          |
| Diabetes                             | 0.88 | 0.56         | 1.40 | 0.592   | 0.29  | 0.26          |
| COPD                                 | 2.12 | 1.38         | 3.25 | 0.001   | 11.91 | 10.62         |
| Ischaemic aetiology                  | 0.92 | 0.59         | 1.45 | 0.722   | 0.13  | 0.12          |
| NYHA class (vs 1)                    |      |              |      | 0.265   | 1.32  | 1.18          |
| 2                                    | 1.90 | 0.81         | 4.47 | 0.140   |       |               |
| 3                                    | 2.39 | 0.98         | 5.81 | 0.055   |       |               |
| 4                                    | 1.81 | 0.40         | 8.16 | 0.440   |       |               |
| Heart rate (per bpm)                 | 1.01 | 1.00         | 1.02 | 0.113   | 2.51  | 2.24          |
| QRS interval (per ms)                | 1.00 | 1.00         | 1.01 | 0.289   | 1.12  | 1.00          |
| Haemoglobin (per g/dl)               | 0.85 | 0.74         | 0.98 | 0.028   | 4.85  | 4.32          |
| Lymphocytes (per 10 <sup>9</sup> /L) | 1.15 | 0.70         | 1.88 | 0.580   | 0.31  | 0.28          |
| Neutrophils (per 10 <sup>9</sup> /L) | 0.99 | 0.90         | 1.08 | 0.823   | 0.05  | 0.04          |
| Platelets (per 10 <sup>9</sup> /L)   | 1.00 | 1.00         | 1.00 | 0.231   | 1.43  | 1.28          |
| Sodium (per mmol/L)                  | 0.97 | 0.92         | 1.02 | 0.247   | 1.34  | 1.19          |
| eGFR (per ml/Kg/min)                 | 0.99 | 0.98         | 1.01 | 0.342   | 0.90  | 0.80          |
| Albumin (per g/L)                    | 0.97 | 0.92         | 1.02 | 0.269   | 1.22  | 1.09          |
| Vitamin D (per 2.82-fold increase)   | 0.61 | 0.41         | 0.92 | 0.018   | 5.62  | 5.01          |
| LVEF (per %)                         | 0.99 | 0.97         | 1.02 | 0.640   | 0.22  | 0.20          |
| Diuretic dose (per mg/day)           | 1.00 | 1.00         | 1.00 | 0.762   | 0.09  | 0.08          |

eGFR - estimated glomerular filtration rate; LVEF - left ventricular ejection fraction; COPD - chronic obstructive pulmonary disease; ICD - implantable cardioverter defibrillator; CRT - cardiac resynchronisation therapy; NYHA - New York heart association.

**Table S3. Multivariate predictors of sepsis death.**

| Variable                             | HR    | 95% CI of HR |       | p value | Wald  | % Global Wald |
|--------------------------------------|-------|--------------|-------|---------|-------|---------------|
|                                      |       | Low          | High  |         |       |               |
| Age (per year)                       | 1.05  | 1.03         | 1.07  | <0.001  | 23.49 | 15.54         |
| Male sex                             | 1.73  | 1.16         | 2.60  | 0.008   | 7.06  | 4.67          |
| Diabetes                             | 0.91  | 0.63         | 1.31  | 0.611   | 0.26  | 0.17          |
| COPD                                 | 2.43  | 1.74         | 3.40  | <0.001  | 26.93 | 17.81         |
| Ischaemic aetiology                  | 0.78  | 0.55         | 1.11  | 0.172   | 1.86  | 1.23          |
| NYHA class (vs 1)                    |       |              |       | 0.079   | 2.27  | 1.50          |
| 2                                    | 1.66  | 0.92         | 3.00  | 0.095   |       |               |
| 3                                    | 2.18  | 1.17         | 4.07  | 0.014   |       |               |
| 4                                    | 1.54  | 0.39         | 6.05  | 0.535   |       |               |
| Heart rate (per bpm)                 | 1.00  | 1.00         | 1.01  | 0.347   | 0.88  | 0.58          |
| QRS interval (per ms)                | 1.00  | 1.00         | 1.01  | 0.333   | 0.94  | 0.62          |
| Haemoglobin (per g/dl)               | 0.90  | 0.80         | 1.00  | 0.052   | 3.78  | 2.50          |
| Lymphocytes (per 10 <sup>9</sup> /L) | 1.13  | 0.82         | 1.58  | 0.452   | 0.56  | 0.37          |
| Neutrophils (per 10 <sup>9</sup> /L) | 0.99  | 0.93         | 1.06  | 0.784   | 0.08  | 0.05          |
| Platelets (per 10 <sup>9</sup> /L)   | 1.002 | 1.000        | 1.005 | 0.027   | 4.86  | 3.21          |
| Sodium (per mmol/L)                  | 0.98  | 0.94         | 1.03  | 0.383   | 0.76  | 0.50          |
| eGFR (per ml/Kg/min)                 | 0.99  | 0.98         | 1.00  | 0.248   | 1.33  | 0.88          |
| Albumin (per g/L)                    | 0.99  | 0.95         | 1.03  | 0.531   | 0.39  | 0.26          |
| Vitamin D (per 2.82-fold increase)   | 0.68  | 0.49         | 0.95  | 0.022   | 5.25  | 3.47          |
| LVEF (per %)                         | 1.00  | 0.98         | 1.02  | 0.921   | 0.01  | 0.01          |
| Diuretic dose (per mg/day)           | 1.00  | 1.00         | 1.00  | 0.886   | 0.02  | 0.01          |

eGFR - estimated glomerular filtration rate; LVEF - left ventricular ejection fraction; COPD - chronic obstructive pulmonary disease; ICD - implantable cardioverter defibrillator; CRT - cardiac resynchronisation therapy; NYHA - New York heart association.

**Table S4. Multivariate predictors of progressive heart failure death.**

| Variable                              | HR   | 95% CI of HR |      | p value | Wald  | % Global Wald |
|---------------------------------------|------|--------------|------|---------|-------|---------------|
|                                       |      | Low          | High |         |       |               |
| Age (per year)                        | 1.03 | 1.01         | 1.05 | 0.001   | 10.23 | 4.69          |
| Male sex                              | 1.32 | 0.95         | 1.85 | 0.101   | 2.68  | 1.23          |
| Diabetes                              | 1.11 | 0.81         | 1.53 | 0.508   | 0.44  | 0.20          |
| COPD                                  | 0.74 | 0.51         | 1.07 | 0.111   | 2.54  | 1.16          |
| Ischaemic aetiology                   | 1.38 | 0.98         | 1.94 | 0.065   | 3.41  | 1.56          |
| NYHA class (vs 1)                     |      |              |      | 0.031   | 2.97  | 1.36          |
| 2                                     | 1.77 | 0.99         | 3.18 | 0.055   |       |               |
| 3                                     | 2.25 | 1.23         | 4.12 | 0.008   |       |               |
| 4                                     | 3.42 | 1.21         | 9.69 | 0.020   |       |               |
| Heart rate (per bpm)                  | 0.99 | 0.99         | 1.00 | 0.158   | 1.99  | 0.91          |
| QRS interval (per ms)                 | 1.00 | 0.99         | 1.00 | 0.112   | 2.53  | 1.16          |
| Haemoglobin (per g/dl)                | 0.93 | 0.85         | 1.03 | 0.176   | 1.83  | 0.84          |
| Lymphocytes (per 10 <sup>9</sup> /L)  | 0.61 | 0.47         | 0.79 | <0.001  | 14.36 | 6.58          |
| Neutrophils (per 10 <sup>9</sup> /L)  | 1.07 | 0.99         | 1.15 | 0.090   | 2.88  | 1.32          |
| Platelets (per 10 <sup>9</sup> /L)    | 1.00 | 0.99         | 1.00 | 0.013   | 6.17  | 2.83          |
| Sodium (per mmol/L)                   | 0.97 | 0.93         | 1.01 | 0.101   | 2.69  | 1.23          |
| eGFR (per ml/Kg/min)                  | 0.99 | 0.98         | 1.00 | 0.071   | 3.26  | 1.49          |
| Albumin (per g/L)                     | 1.00 | 0.96         | 1.04 | 0.878   | 0.02  | 0.01          |
| Ln Vitamin D (per 2.82-fold increase) | 0.88 | 0.65         | 1.19 | 0.401   | 0.71  | 0.33          |
| LVEF (per %)                          | 0.97 | 0.96         | 0.98 | <0.001  | 15.29 | 7.01          |
| Diuretic dose (per mg/day)            | 1.01 | 1.00         | 1.01 | <0.001  | 23    | 10.54         |

eGFR - estimated glomerular filtration rate; LVEF - left ventricular ejection fraction; COPD - chronic obstructive pulmonary disease;

ICD - implantable cardioverter defibrillator; CRT - cardiac resynchronisation therapy; NYHA - New York heart association.

**Table S5. Multivariate predictors of sudden cardiac death.**

| Variable                              | HR   | 95% CI of HR |      | p value | Wald  | % Global Wald |
|---------------------------------------|------|--------------|------|---------|-------|---------------|
|                                       |      | Low          | High |         |       |               |
| Age (per year)                        | 0.98 | 0.97         | 1.00 | 0.085   | 2.96  | 4.13          |
| Male sex                              | 1.70 | 1.02         | 2.84 | 0.043   | 4.11  | 5.73          |
| Diabetes                              | 1.46 | 0.98         | 2.18 | 0.064   | 3.44  | 4.80          |
| COPD                                  | 2.19 | 1.39         | 3.46 | 0.001   | 11.35 | 15.83         |
| Ischaemic aetiology                   | 1.37 | 0.87         | 2.14 | 0.176   | 1.83  | 2.55          |
| NYHA class (vs 1)                     |      |              |      | 0.452   | 0.88  | 1.23          |
| 2                                     | 1.51 | 0.83         | 2.77 | 0.181   |       |               |
| 3                                     | 1.17 | 0.59         | 2.29 | 0.657   |       |               |
| 4                                     | 1.39 | 0.28         | 6.98 | 0.689   |       |               |
| Heart rate (per bpm)                  | 1.00 | 0.99         | 1.02 | 0.669   | 0.18  | 0.25          |
| QRS interval (per ms)                 | 1.00 | 1.00         | 1.01 | 0.312   | 1.02  | 1.42          |
| Haemoglobin (per g/dl)                | 1.01 | 0.90         | 1.15 | 0.827   | 0.05  | 0.07          |
| Lymphocytes (per 10 <sup>9</sup> /L)  | 0.94 | 0.73         | 1.21 | 0.619   | 0.25  | 0.35          |
| Neutrophils (per 10 <sup>9</sup> /L)  | 1.09 | 1.01         | 1.17 | 0.030   | 4.69  | 6.54          |
| Platelets (per 10 <sup>9</sup> /L)    | 1.00 | 1.00         | 1.00 | 0.561   | 0.34  | 0.47          |
| Sodium (per mmol/L)                   | 0.93 | 0.89         | 0.97 | 0.001   | 11.65 | 16.25         |
| eGFR (per ml/Kg/min)                  | 0.99 | 0.98         | 1.00 | 0.192   | 1.71  | 2.38          |
| Albumin (per g/L)                     | 0.98 | 0.93         | 1.03 | 0.441   | 0.59  | 0.82          |
| Ln Vitamin D (per 2.82-fold increase) | 0.85 | 0.57         | 1.24 | 0.393   | 0.73  | 1.02          |
| LVEF (per %)                          | 0.98 | 0.96         | 1.00 | 0.062   | 3.47  | 4.84          |
| Diuretic dose (per mg/day)            | 1.00 | 0.99         | 1.00 | 0.112   | 2.53  | 3.53          |

eGFR - estimated glomerular filtration rate; LVEF - left ventricular ejection fraction; COPD - chronic obstructive pulmonary disease; ICD - implantable cardioverter defibrillator; CRT - cardiac resynchronisation therapy; NYHA - New York heart association.



**Table S6. Multivariate predictors of other (non-sepsis) non-cardiovascular death.**

| Variable                              | HR   | 95% CI of HR |      | p value | Wald  | % Global Wald |
|---------------------------------------|------|--------------|------|---------|-------|---------------|
|                                       |      | Low          | High |         |       |               |
| Age (per year)                        | 1.01 | 1.00         | 1.03 | 0.145   | 2.12  | 4.41          |
| Male sex                              | 1.11 | 0.73         | 1.69 | 0.613   | 0.26  | 0.54          |
| Diabetes                              | 1.02 | 0.70         | 1.48 | 0.914   | 0.01  | 0.02          |
| COPD                                  | 1.01 | 0.64         | 1.58 | 0.978   | 0     | 0.00          |
| Ischaemic aetiology                   | 0.93 | 0.64         | 1.34 | 0.683   | 0.17  | 0.35          |
| NYHA class (vs 1)                     |      |              |      | 0.750   | 0.4   | 0.83          |
| 2                                     | 0.77 | 0.47         | 1.26 | 0.299   |       |               |
| 3                                     | 0.87 | 0.50         | 1.50 | 0.611   |       |               |
| 4                                     | 0.92 | 0.25         | 3.40 | 0.896   |       |               |
| Heart rate (per bpm)                  | 1.00 | 0.99         | 1.01 | 0.596   | 0.28  | 0.58          |
| QRS interval (per ms)                 | 1.00 | 0.99         | 1.01 | 0.758   | 0.1   | 0.21          |
| Haemoglobin (per g/dl)                | 0.89 | 0.80         | 1.00 | 0.042   | 4.13  | 8.58          |
| Lymphocytes (per 10 <sup>9</sup> /L)  | 0.89 | 0.67         | 1.18 | 0.431   | 0.62  | 1.29          |
| Neutrophils (per 10 <sup>9</sup> /L)  | 1.07 | 0.98         | 1.17 | 0.147   | 2.11  | 4.38          |
| Platelets (per 10 <sup>9</sup> /L)    | 1.00 | 1.00         | 1.00 | 0.232   | 1.43  | 2.97          |
| Sodium (per mmol/L)                   | 1.02 | 0.97         | 1.06 | 0.505   | 0.44  | 0.91          |
| eGFR (per ml/Kg/min)                  | 1.00 | 0.99         | 1.01 | 0.468   | 0.53  | 1.10          |
| Albumin (per g/L)                     | 0.92 | 0.87         | 0.97 | 0.001   | 10.12 | 21.03         |
| Ln Vitamin D (per 2.82-fold increase) | 0.97 | 0.69         | 1.35 | 0.843   | 0.04  | 0.08          |
| LVEF (per %)                          | 1.01 | 0.99         | 1.03 | 0.201   | 1.64  | 3.41          |
| Diuretic dose (per mg/day)            | 1.00 | 1.00         | 1.00 | 0.979   | 0     | 0.00          |

eGFR - estimated glomerular filtration rate; LVEF - left ventricular ejection fraction; COPD - chronic obstructive pulmonary disease; ICD - implantable cardioverter defibrillator; CRT - cardiac resynchronisation therapy; NYHA - New York heart association.

**Table S7. Multivariate predictors of all-cause death.**

| Variable                              | HR   | 95% CI of HR |      | p value | Wald  | % Global Wald |
|---------------------------------------|------|--------------|------|---------|-------|---------------|
|                                       |      | Low          | High |         |       |               |
| Age (per year)                        | 1.04 | 1.03         | 1.04 | <0.001  | 62.6  | 12.34         |
| Male sex                              | 1.67 | 1.38         | 2.01 | <0.001  | 28.6  | 5.64          |
| Diabetes                              | 1.21 | 1.02         | 1.43 | 0.026   | 4.97  | 0.98          |
| COPD                                  | 1.64 | 1.37         | 1.97 | <0.001  | 29    | 5.72          |
| Ischaemic aetiology                   | 1.01 | 0.85         | 1.20 | 0.896   | 0.02  | 0.00          |
| NYHA class (vs 1)                     |      |              |      | 0.002   | 4.86  | 0.96          |
| 2                                     | 1.44 | 1.11         | 1.88 | 0.006   |       |               |
| 3                                     | 1.59 | 1.21         | 2.09 | 0.001   |       |               |
| 4                                     | 2.36 | 1.37         | 4.04 | 0.002   |       |               |
| Heart rate (per bpm)                  | 1.00 | 1.00         | 1.01 | 0.273   | 1.2   | 0.24          |
| QRS interval (per ms)                 | 1.00 | 1.00         | 1.00 | 0.988   | 0     | 0.00          |
| Haemoglobin (per g/dl)                | 0.87 | 0.83         | 0.92 | <0.001  | 28.56 | 5.63          |
| Lymphocytes (per 10 <sup>9</sup> /L)  | 0.77 | 0.68         | 0.87 | <0.001  | 17.73 | 3.50          |
| Neutrophils (per 10 <sup>9</sup> /L)  | 1.09 | 1.05         | 1.13 | <0.001  | 21.51 | 4.24          |
| Platelets (per 10 <sup>9</sup> /L)    | 1.00 | 1.00         | 1.00 | 0.093   | 2.82  | 0.56          |
| Sodium (per mmol/L)                   | 0.96 | 0.94         | 0.98 | <0.001  | 15.29 | 3.01          |
| eGFR (per ml/Kg/min)                  | 0.99 | 0.99         | 1.00 | 0.004   | 8.26  | 1.63          |
| Albumin (per g/L)                     | 0.95 | 0.93         | 0.97 | <0.001  | 21.24 | 4.19          |
| Ln Vitamin D (per 2.82-fold increase) | 0.88 | 0.76         | 1.02 | 0.100   | 2.72  | 0.54          |
| LVEF (per %)                          | 0.99 | 0.98         | 0.99 | 0.001   | 10.96 | 2.16          |
| Diuretic dose (per mg/day)            | 1.00 | 1.00         | 1.00 | 0.002   | 9.48  | 1.87          |

eGFR - estimated glomerular filtration rate; LVEF - left ventricular ejection fraction; COPD - chronic obstructive pulmonary disease; ICD - implantable cardioverter defibrillator; CRT - cardiac resynchronisation therapy; NYHA - New York heart association.

**Figure S1. Sepsis death in relation to other common modes of death in people with LVEF<40%.**

A) Relative contribution of modes of death to overall mortality, with sepsis (represented by the hatched region) accounting for over half of non-cardiovascular death. B) Relative contribution of primary sources of sepsis to overall sepsis deaths.

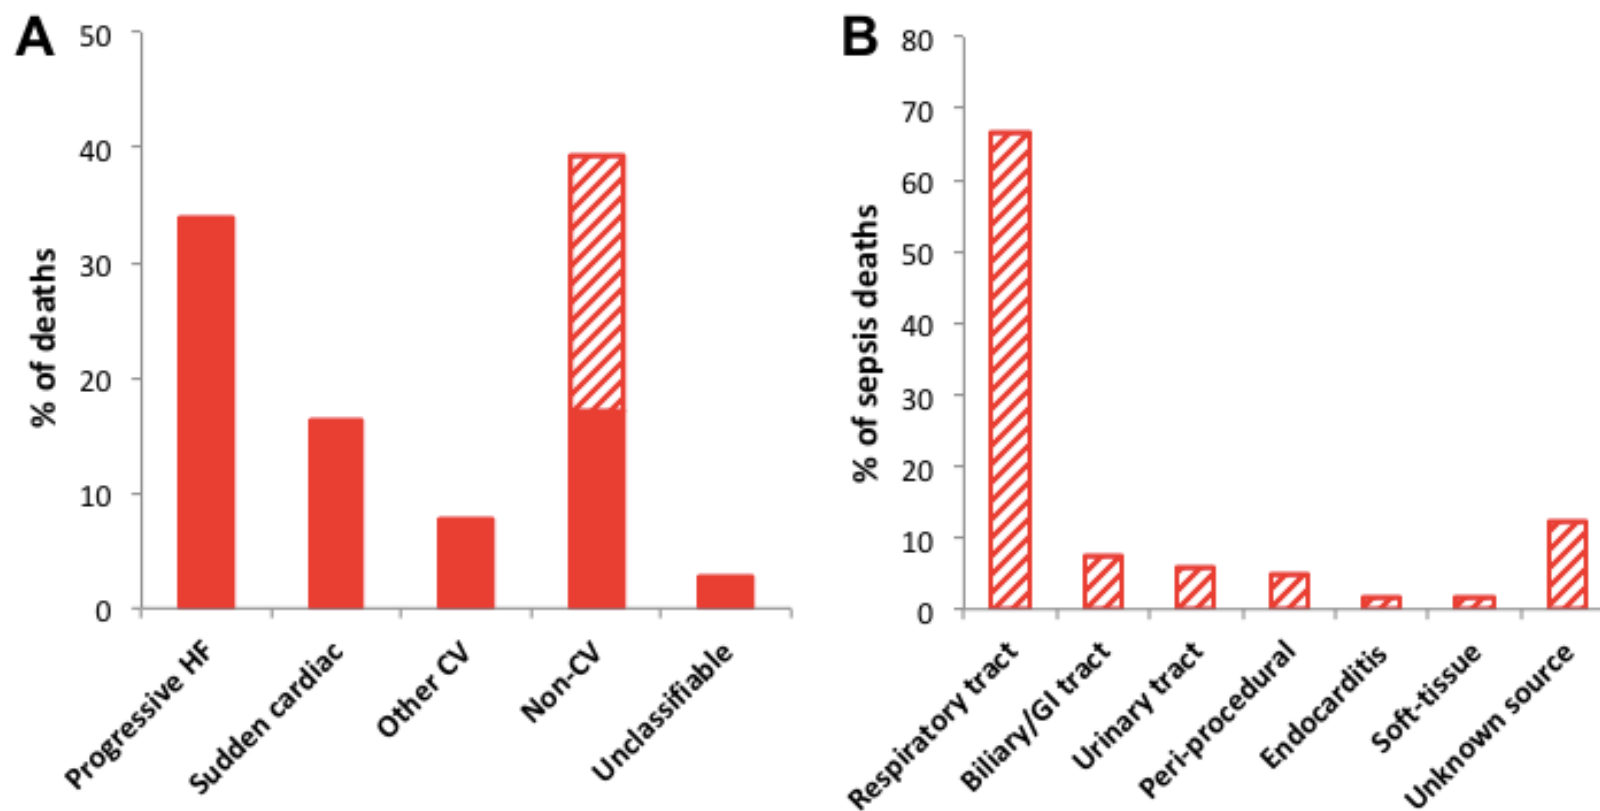

**Figure S2. Cumulative incidence of sepsis death in relation to other common modes of death in people with LVEF<40%.**

Cumulative incidence functions illustrating sepsis, other non-cardiovascular, progressive heart failure and sudden cardiac death during follow-up of people with LVEF<40%.

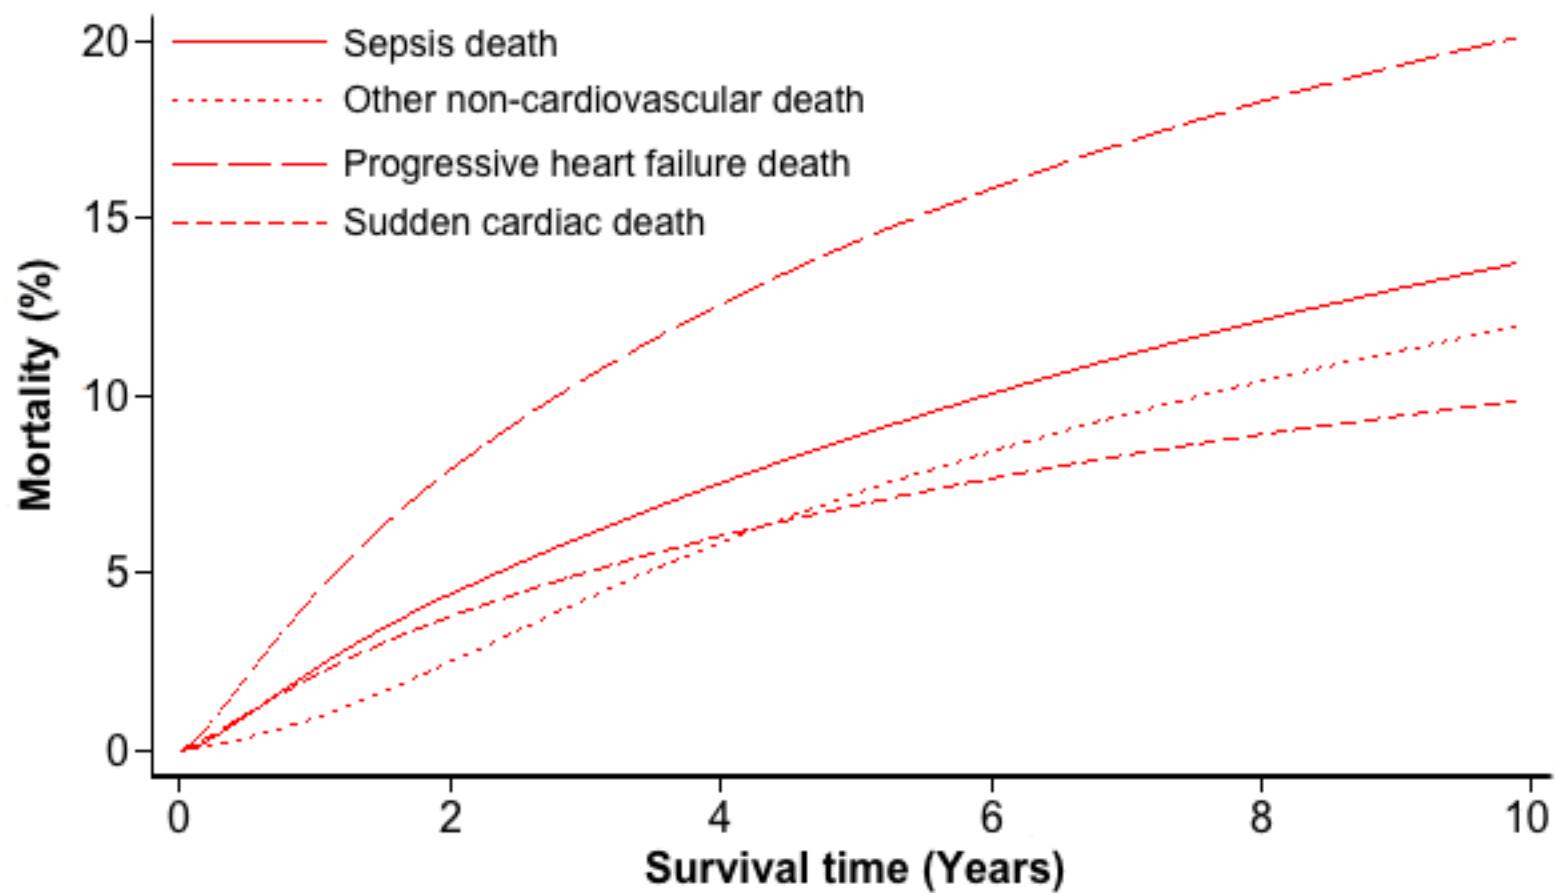

### **Supplemental References:**

1. White IR, Royston P, Wood AM. Multiple imputation using chained equations: issues and guidance for practice. *Stat Med.* 2011;30:377-99.
2. Sterne JA, White IR, Carlin JB, Spratt M, Royston P, Kenward MG, Wood AM, Carpenter JR. Multiple imputation for missing data in epidemiological and clinical research: potential and pitfalls. *BMJ.* 2009;338:b2393.
